# Supplementary material for: Health literacy in context: struggling to self-manage diabetes – a longitudinal qualitative study
Source: HighWire-hosted journal article supplement (doi:10.1136/bmjopen-2020-046759), 2022-06-01
Supplement: bmjopen-2020-046759supp002_data_supplement.pdf [file bmjopen-2020-046759supp002_data_supplement.pdf]

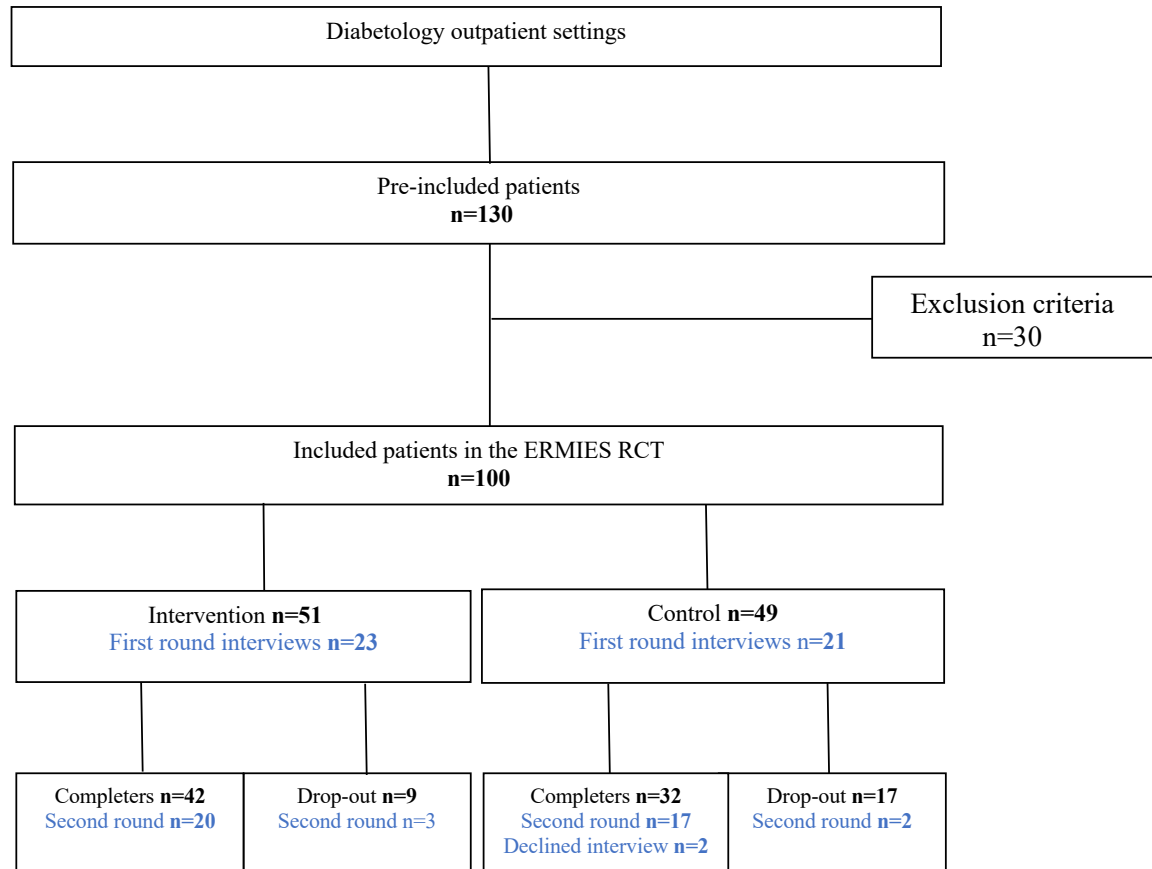

### Qualitative study nested in the ERMIES trial. Flow chart of participants
