# Supplementary material for: Health literacy in context: struggling to self-manage diabetes – a longitudinal qualitative study
Source: HighWire-hosted journal article supplement (doi:10.1136/bmjopen-2020-046759), 2022-06-01
Supplement: bmjopen-2020-046759supp004_data_supplement.pdf [file bmjopen-2020-046759supp004_data_supplement.pdf]

**Appendix 4. Health Literacy Questionnaire scales.**

---

| <b>HLQ scale 1<sup>st</sup> part of the questionnaire</b>         |                                                                     |         |
|-------------------------------------------------------------------|---------------------------------------------------------------------|---------|
| Response options from 1 -strongly disagree- to 4 -strongly agree- |                                                                     |         |
| <b>HLQ 1</b>                                                      | <b>Feeling understood and supported by healthcare professionals</b> | 4 items |
| <b>HLQ 2</b>                                                      | <b>Having sufficient information to manage my health</b>            | 4 items |
| <b>HLQ 3</b>                                                      | <b>Actively managing my health</b>                                  | 5 items |
| <b>HLQ 4</b>                                                      | <b>Social support for health</b>                                    | 5 items |
| <b>HLQ 5</b>                                                      | <b>Appraisal of health information</b>                              | 5 items |

---

| <b>HLQ scale 2<sup>nd</sup> part of the questionnaire</b>           |                                                                 |         |
|---------------------------------------------------------------------|-----------------------------------------------------------------|---------|
| Response options from 1-cannot do or always difficult- to 5 -always |                                                                 |         |
| <b>HLQ 6</b>                                                        | <b>Ability to actively engage with healthcare professionals</b> | 5 items |
| <b>HLQ 7</b>                                                        | <b>Navigating the healthcare system</b>                         | 6 items |
| <b>HLQ 8</b>                                                        | <b>Ability to find good health information</b>                  | 5 items |
| <b>HLQ 9</b>                                                        | <b>Understand health information enough to know what to do</b>  | 5 items |

---
